# Supplementary material for: A Biased Competition Theory of Cytotoxic T Lymphocyte Interaction with Tumor Nodules
Source: PubMed Central journal article supplement (PMC4376944; doi:10.1371/journal.pone.0120053), 2015-03-27
Supplement: pone.0120053.s008.pdf [file pone.0120053.s008.pdf]

## Supporting Information S1 Table.

|          | parameter          | description                                                                                                                  | value                                                    |
|----------|--------------------|------------------------------------------------------------------------------------------------------------------------------|----------------------------------------------------------|
| CTL      | $v^*$              | CTL displacement velocity                                                                                                    | $8.66\mu m/min$                                          |
|          | $\mu^{*o}$         | Inverse of the time required for killing one target cell                                                                     | $0.038min^{-1}$                                          |
|          | $\kappa^\diamond$  | Number of tumor cells killed by a single CTL                                                                                 | 5                                                        |
|          | $N_{CTL}^o$        | CTL number at the beginning of the simulation                                                                                |                                                          |
| Melanoma | $\Delta^*$         | Melanoma cell diameter                                                                                                       | $12.5\mu m$                                              |
| Nodule   | $L^\diamond$       | Melanoma nodule diameter at the beginning of the simulation                                                                  | $300\mu m$                                               |
|          | $\lambda^*$        | Inverse of the time required for tumor cell division                                                                         | $0.001min^{-1}$                                          |
|          | $E^*$              | Thickness of the proliferative shell of the tumor mass                                                                       | $2\Delta$                                                |
|          | $p_{res}^\diamond$ | Probability of a tumor cell to become more resistant to CTL attack at each division                                          | $\frac{1}{2}$                                            |
|          | $p_{inv}^\diamond$ | Probability of a tumor cell to become “invisible” to CTL at each division                                                    | $\frac{1}{2} \left( \frac{1}{2} - \frac{1}{res} \right)$ |
| Motility | $D^\diamond$       | Maximal distance allowed for CTL attraction (if distance between CTL and tumor mass $\geq \sqrt{D}$ , CTL are not attracted) | $350\mu m$                                               |
| Biased   | $K^\diamond$       | Number of scout CTL generating a maximal attraction                                                                          | 10                                                       |
|          | $\nu^o$            | Maximal level of attraction                                                                                                  |                                                          |

**S1 Table. Parameters used in simulations.** \* estimated parameters, <sup>o</sup> varying parameters, <sup>◇</sup> arbitrary parameters.
